# Supplementary material for: Characterization of disease-specific cellular abundance profiles of chronic inflammatory skin conditions from deconvolution of biopsy samples
Source: PubMed Central journal article supplement (PMC6698047; doi:10.1186/s12920-019-0567-7), 2019-08-17
Supplement: 12920_2019_567_MOESM6_ESM.pdf [file 12920_2019_567_MOESM6_ESM.pdf]

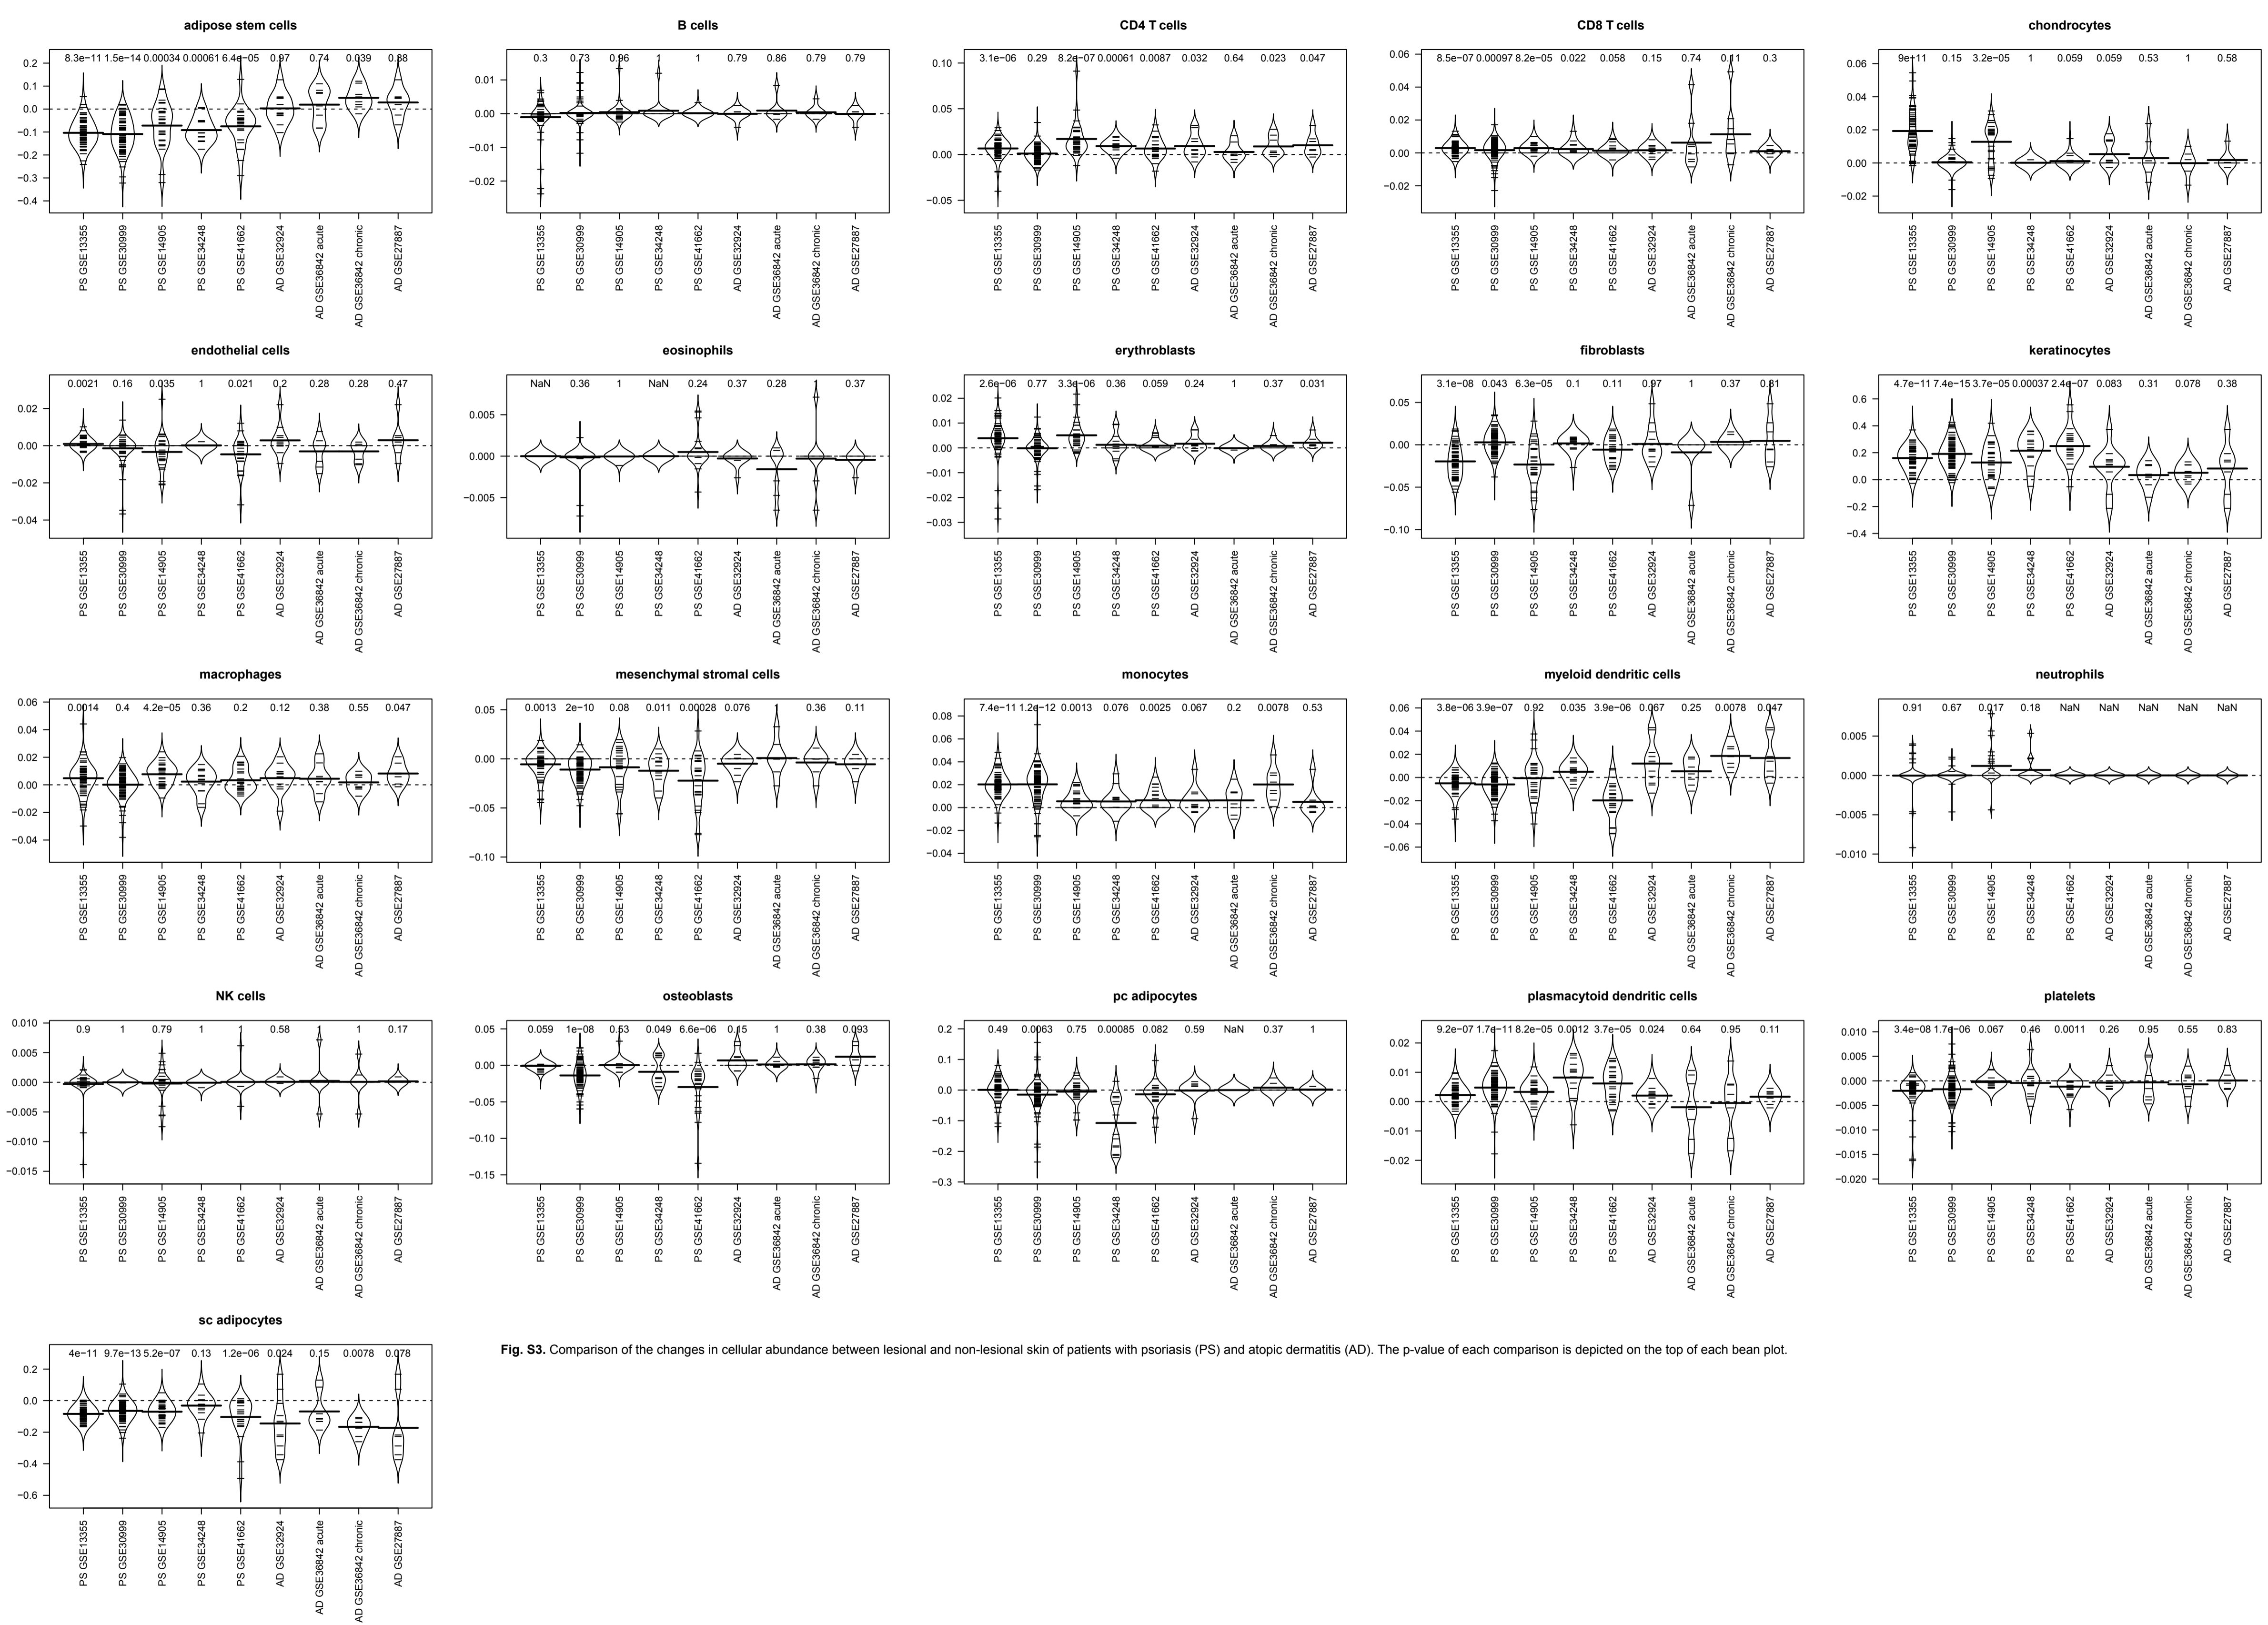

**Fig. S3.** Comparison of the changes in cellular abundance between lesional and non-lesional skin of patients with psoriasis (PS) and atopic dermatitis (AD). The p-value of each comparison is depicted on the top of each bean plot.
