# Supplementary material for: Characterization of disease-specific cellular abundance profiles of chronic inflammatory skin conditions from deconvolution of biopsy samples
Source: PubMed Central journal article supplement (PMC6698047; doi:10.1186/s12920-019-0567-7), 2019-08-17
Supplement: 12920_2019_567_MOESM7_ESM.pdf [file 12920_2019_567_MOESM7_ESM.pdf]

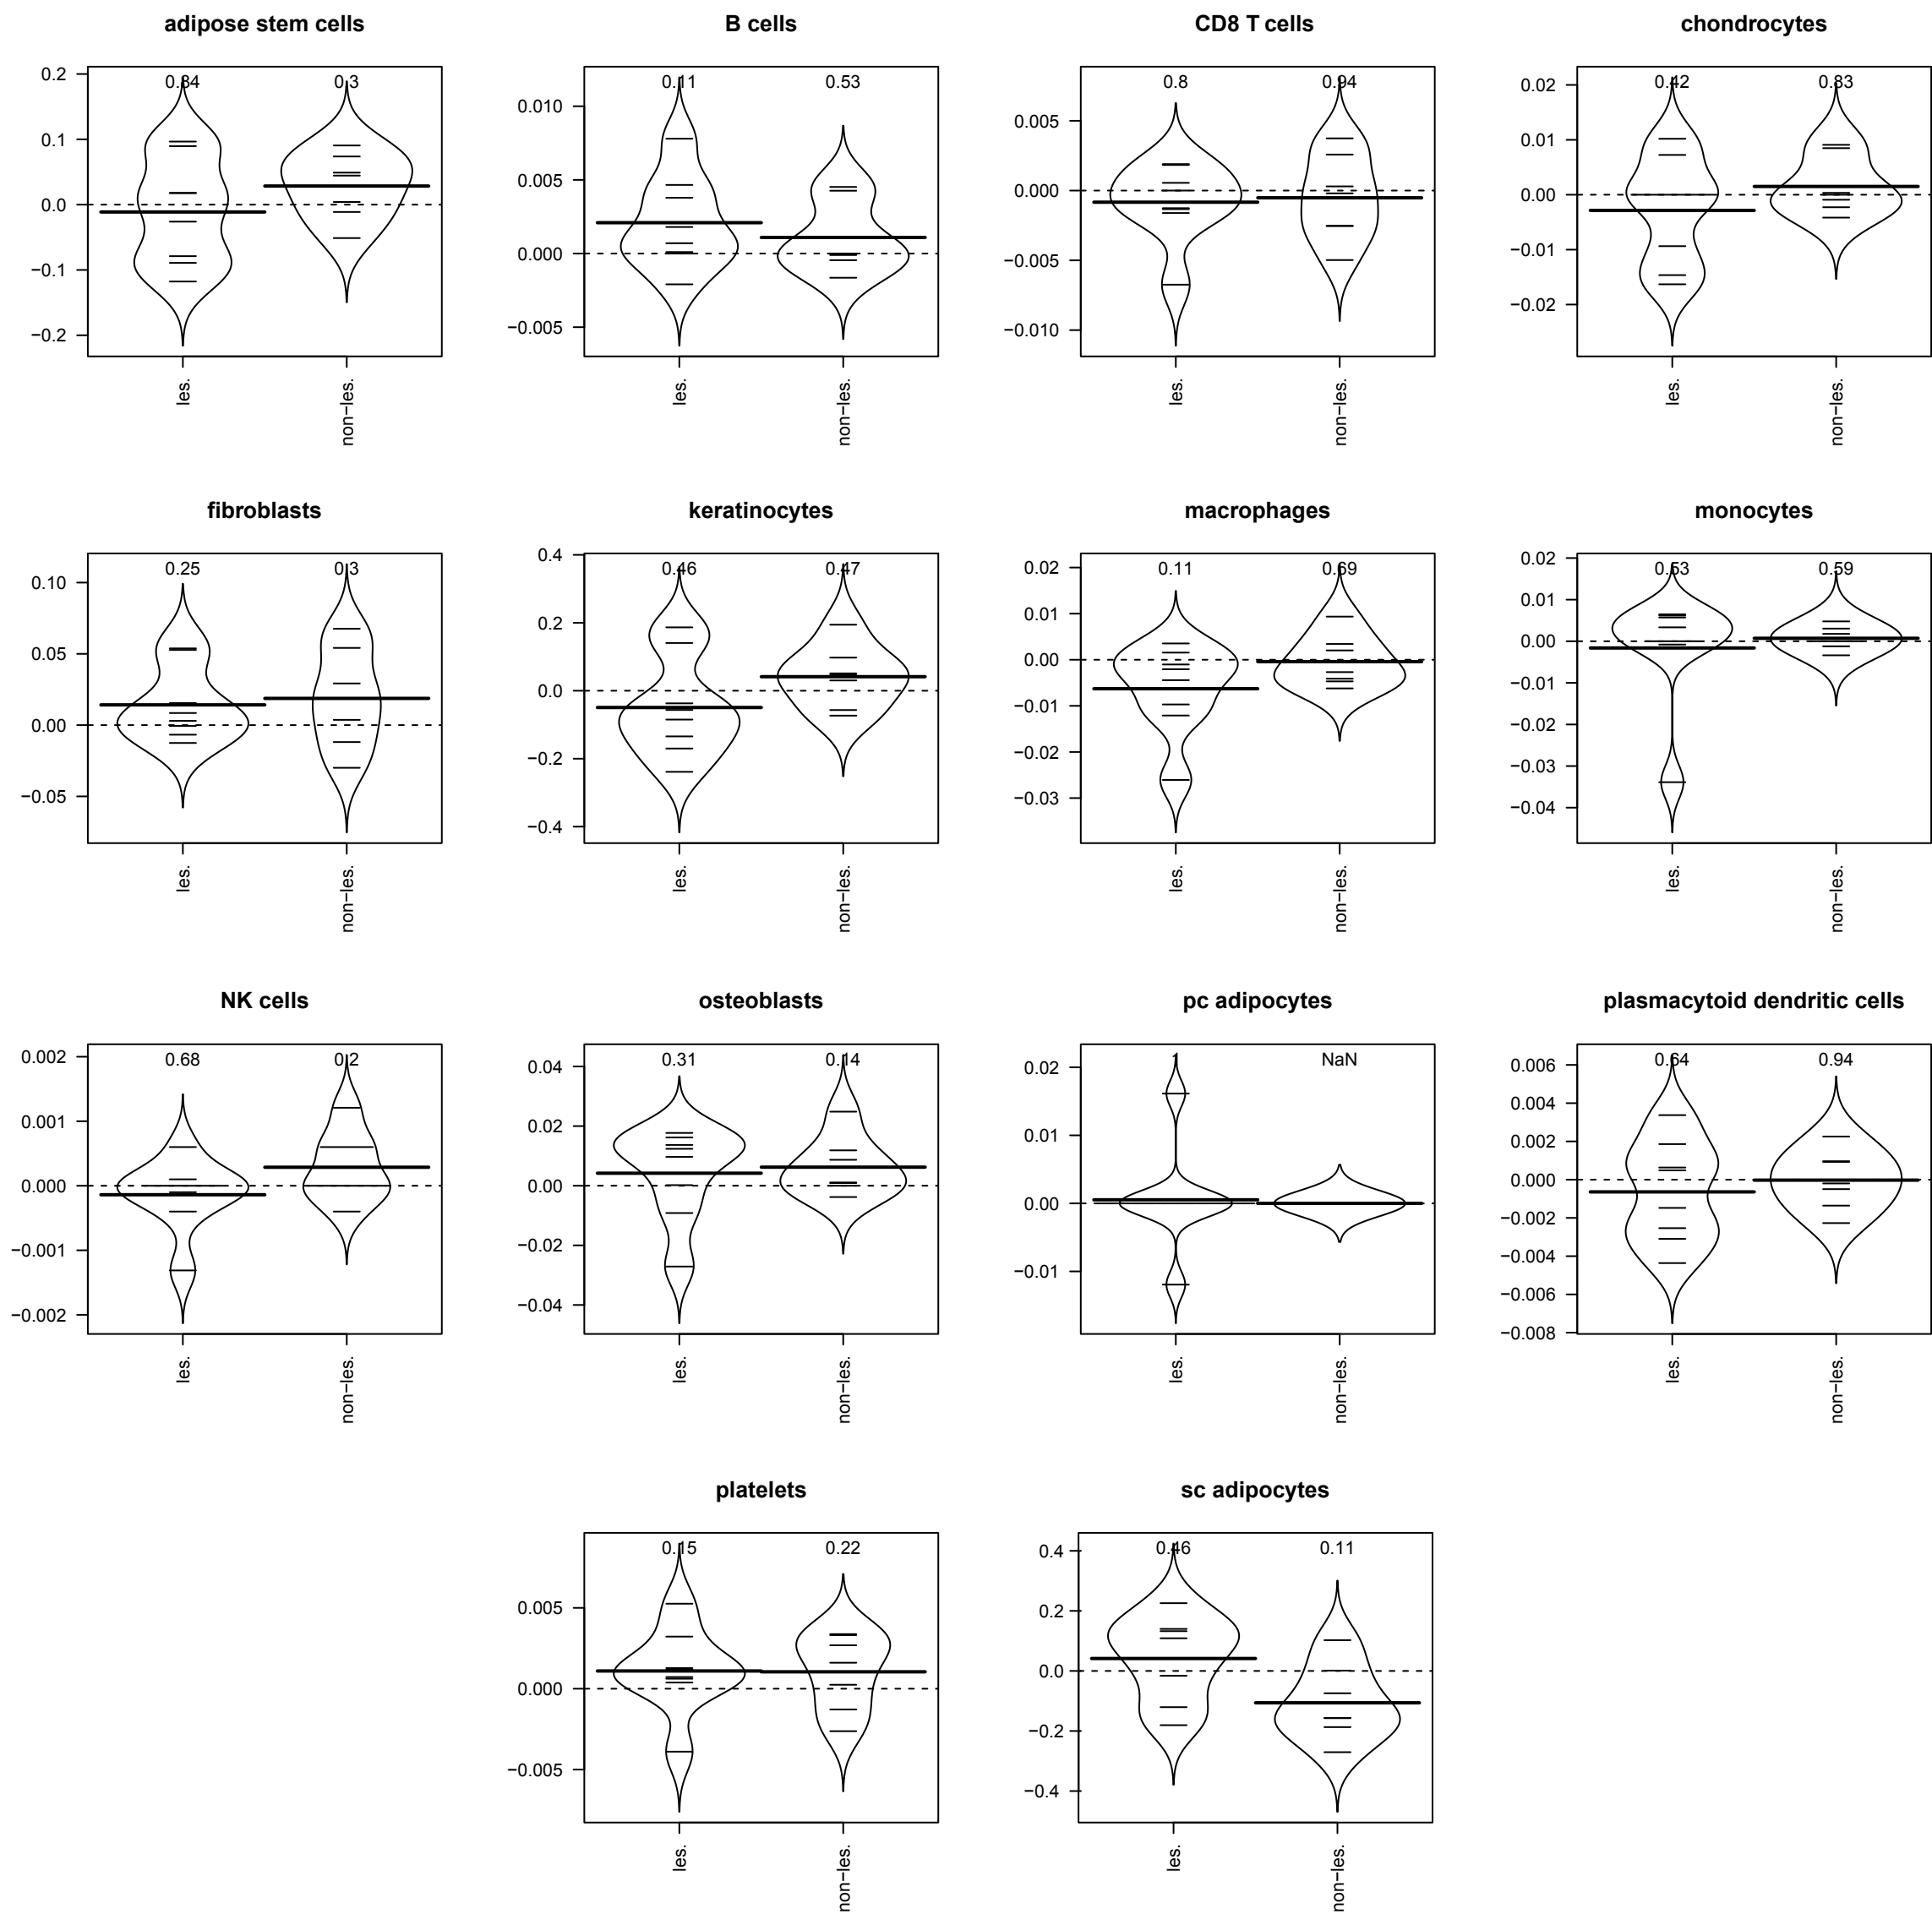

**Fig. S4. Changes in cellular composition due to UVB phototherapy.** Comparison of the abundance of various cell types in the lesional (les) and non-lesional (non-les) skin of patients with atopic dermatitis before and after narrow-band UVB phototherapy. Expression data from dataset GSE27887 was used for this analysis. The p-values of each comparison are presented above each violinplot.
