# Supplementary material for: Characterization of disease-specific cellular abundance profiles of chronic inflammatory skin conditions from deconvolution of biopsy samples
Source: PubMed Central journal article supplement (PMC6698047; doi:10.1186/s12920-019-0567-7), 2019-08-17
Supplement: 12920_2019_567_MOESM8_ESM.pdf [file 12920_2019_567_MOESM8_ESM.pdf]

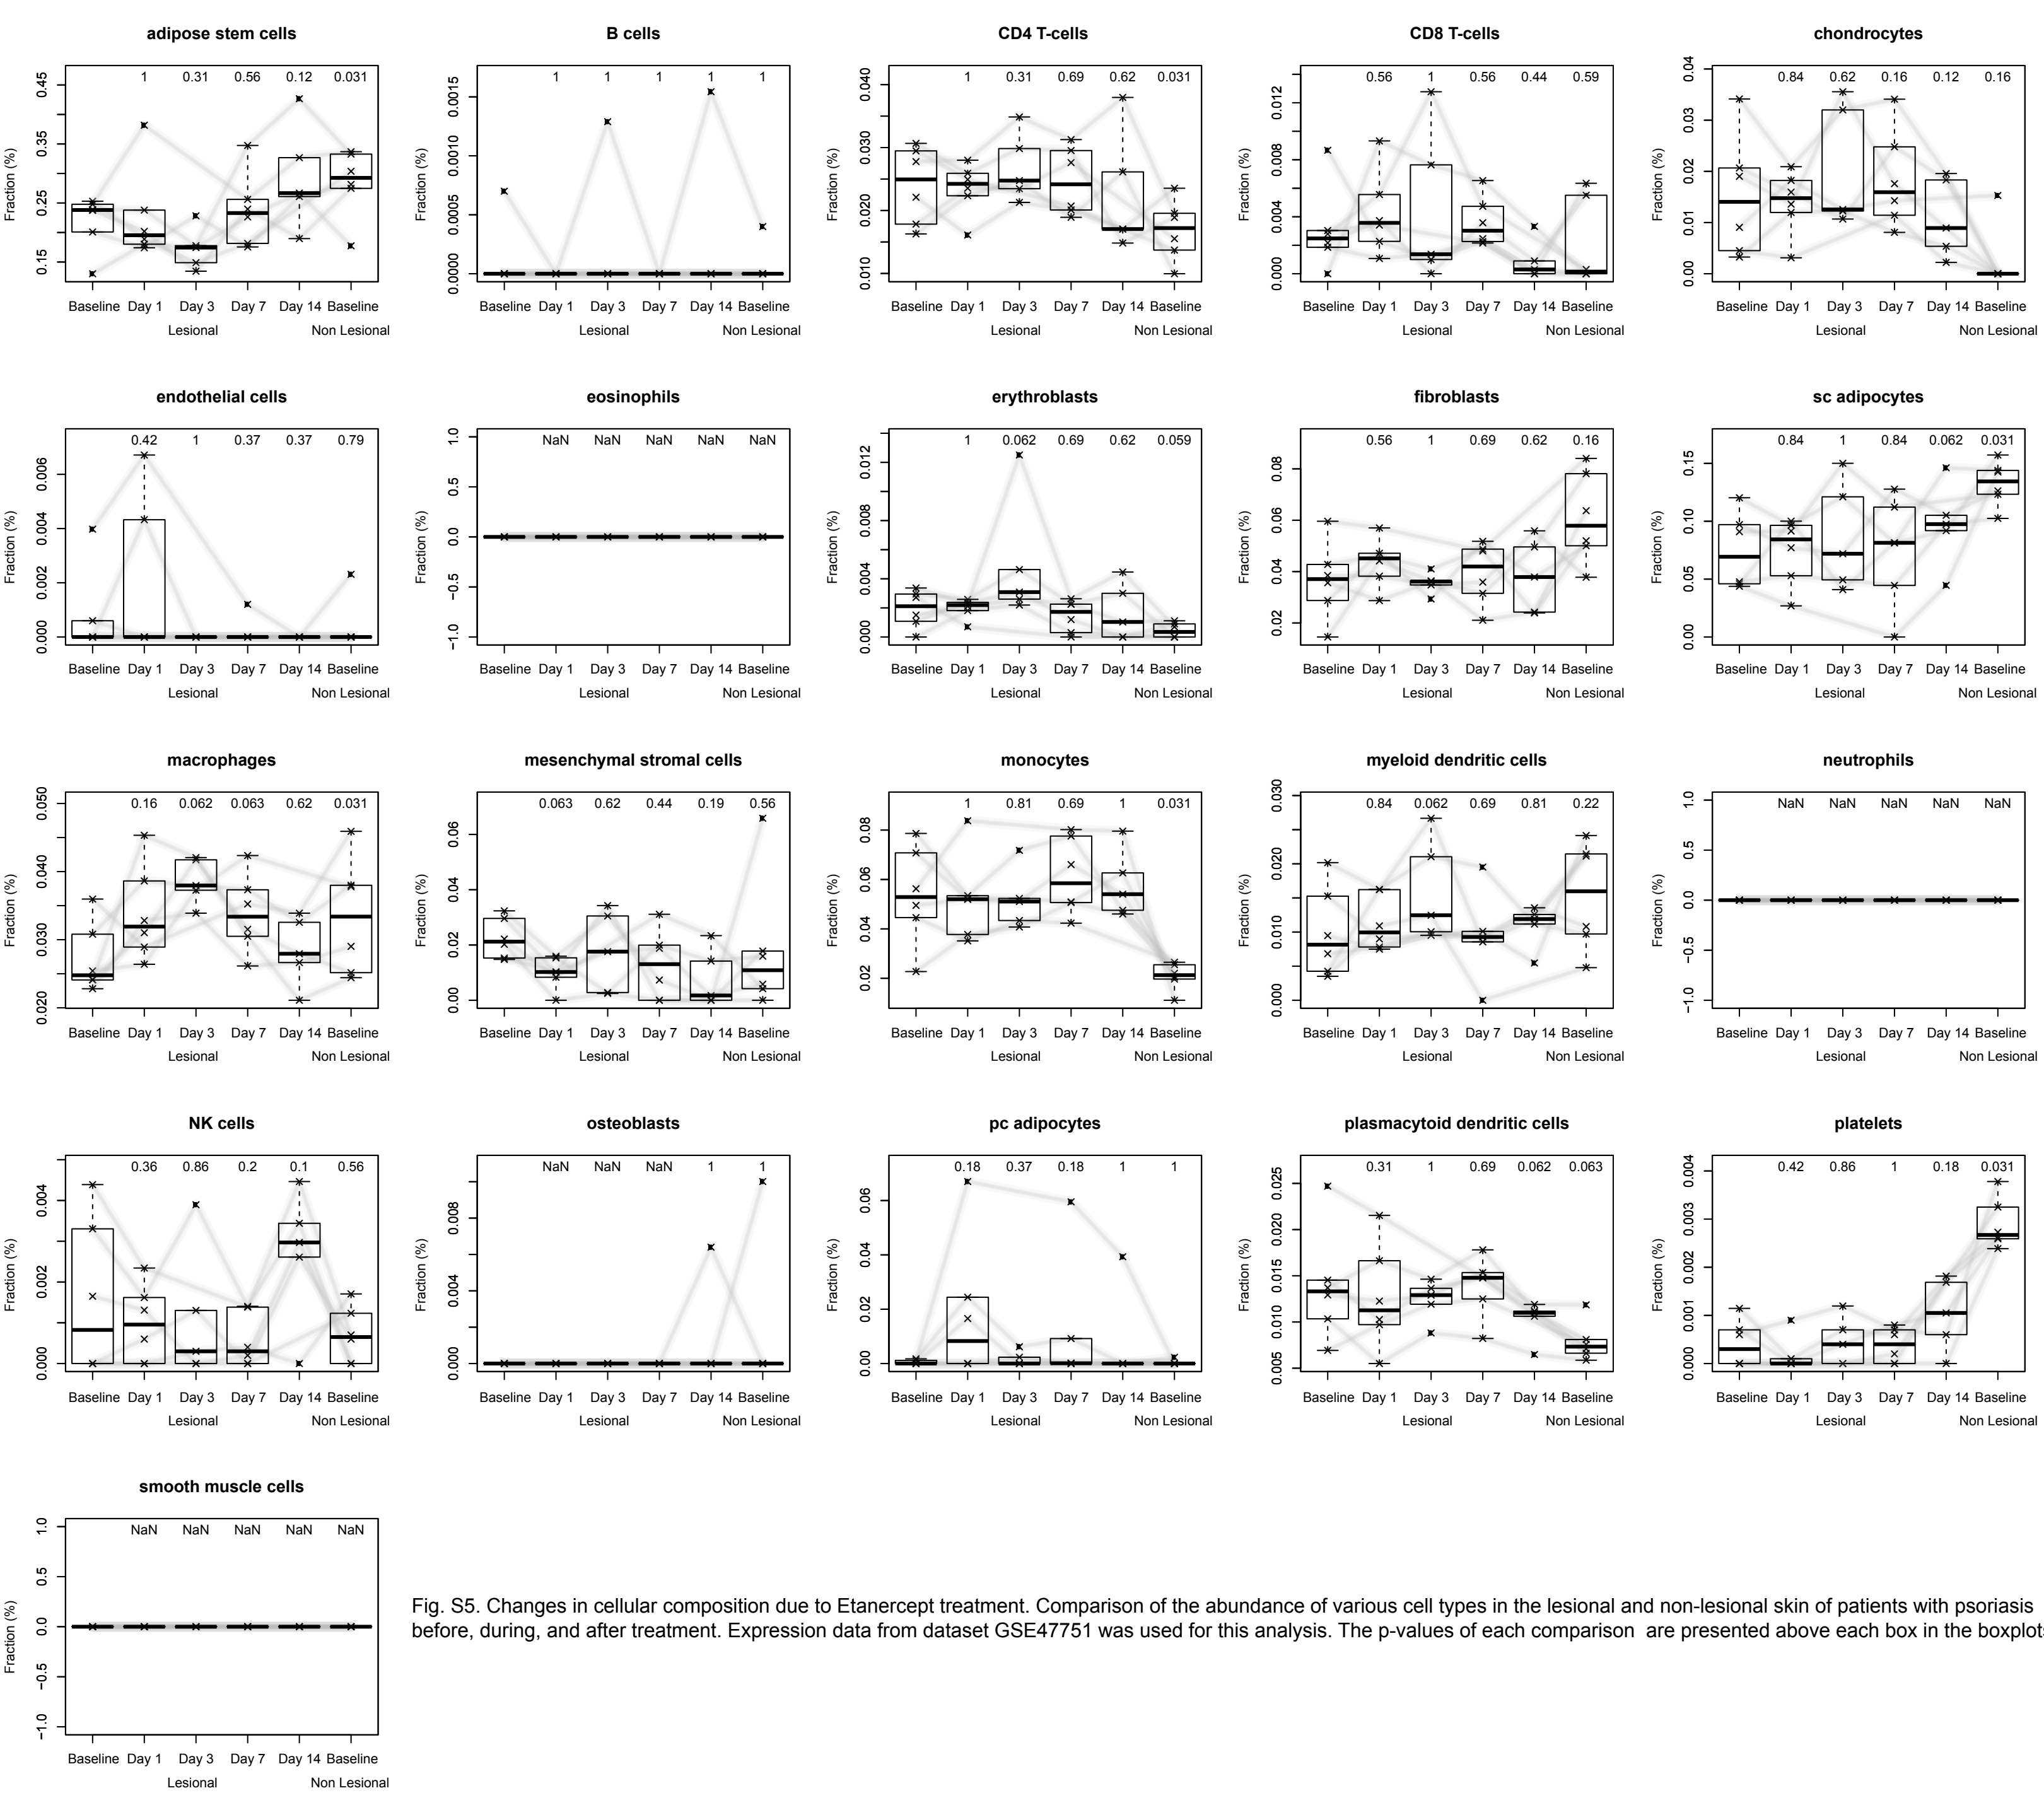

Fig. S5. Changes in cellular composition due to Etanercept treatment. Comparison of the abundance of various cell types in the lesional and non-lesional skin of patients with psoriasis before, during, and after treatment. Expression data from dataset GSE47751 was used for this analysis. The p-values of each comparison are presented above each box in the boxplots.
