# Supplementary material for: Characterization of disease-specific cellular abundance profiles of chronic inflammatory skin conditions from deconvolution of biopsy samples
Source: PubMed Central journal article supplement (PMC6698047; doi:10.1186/s12920-019-0567-7), 2019-08-17

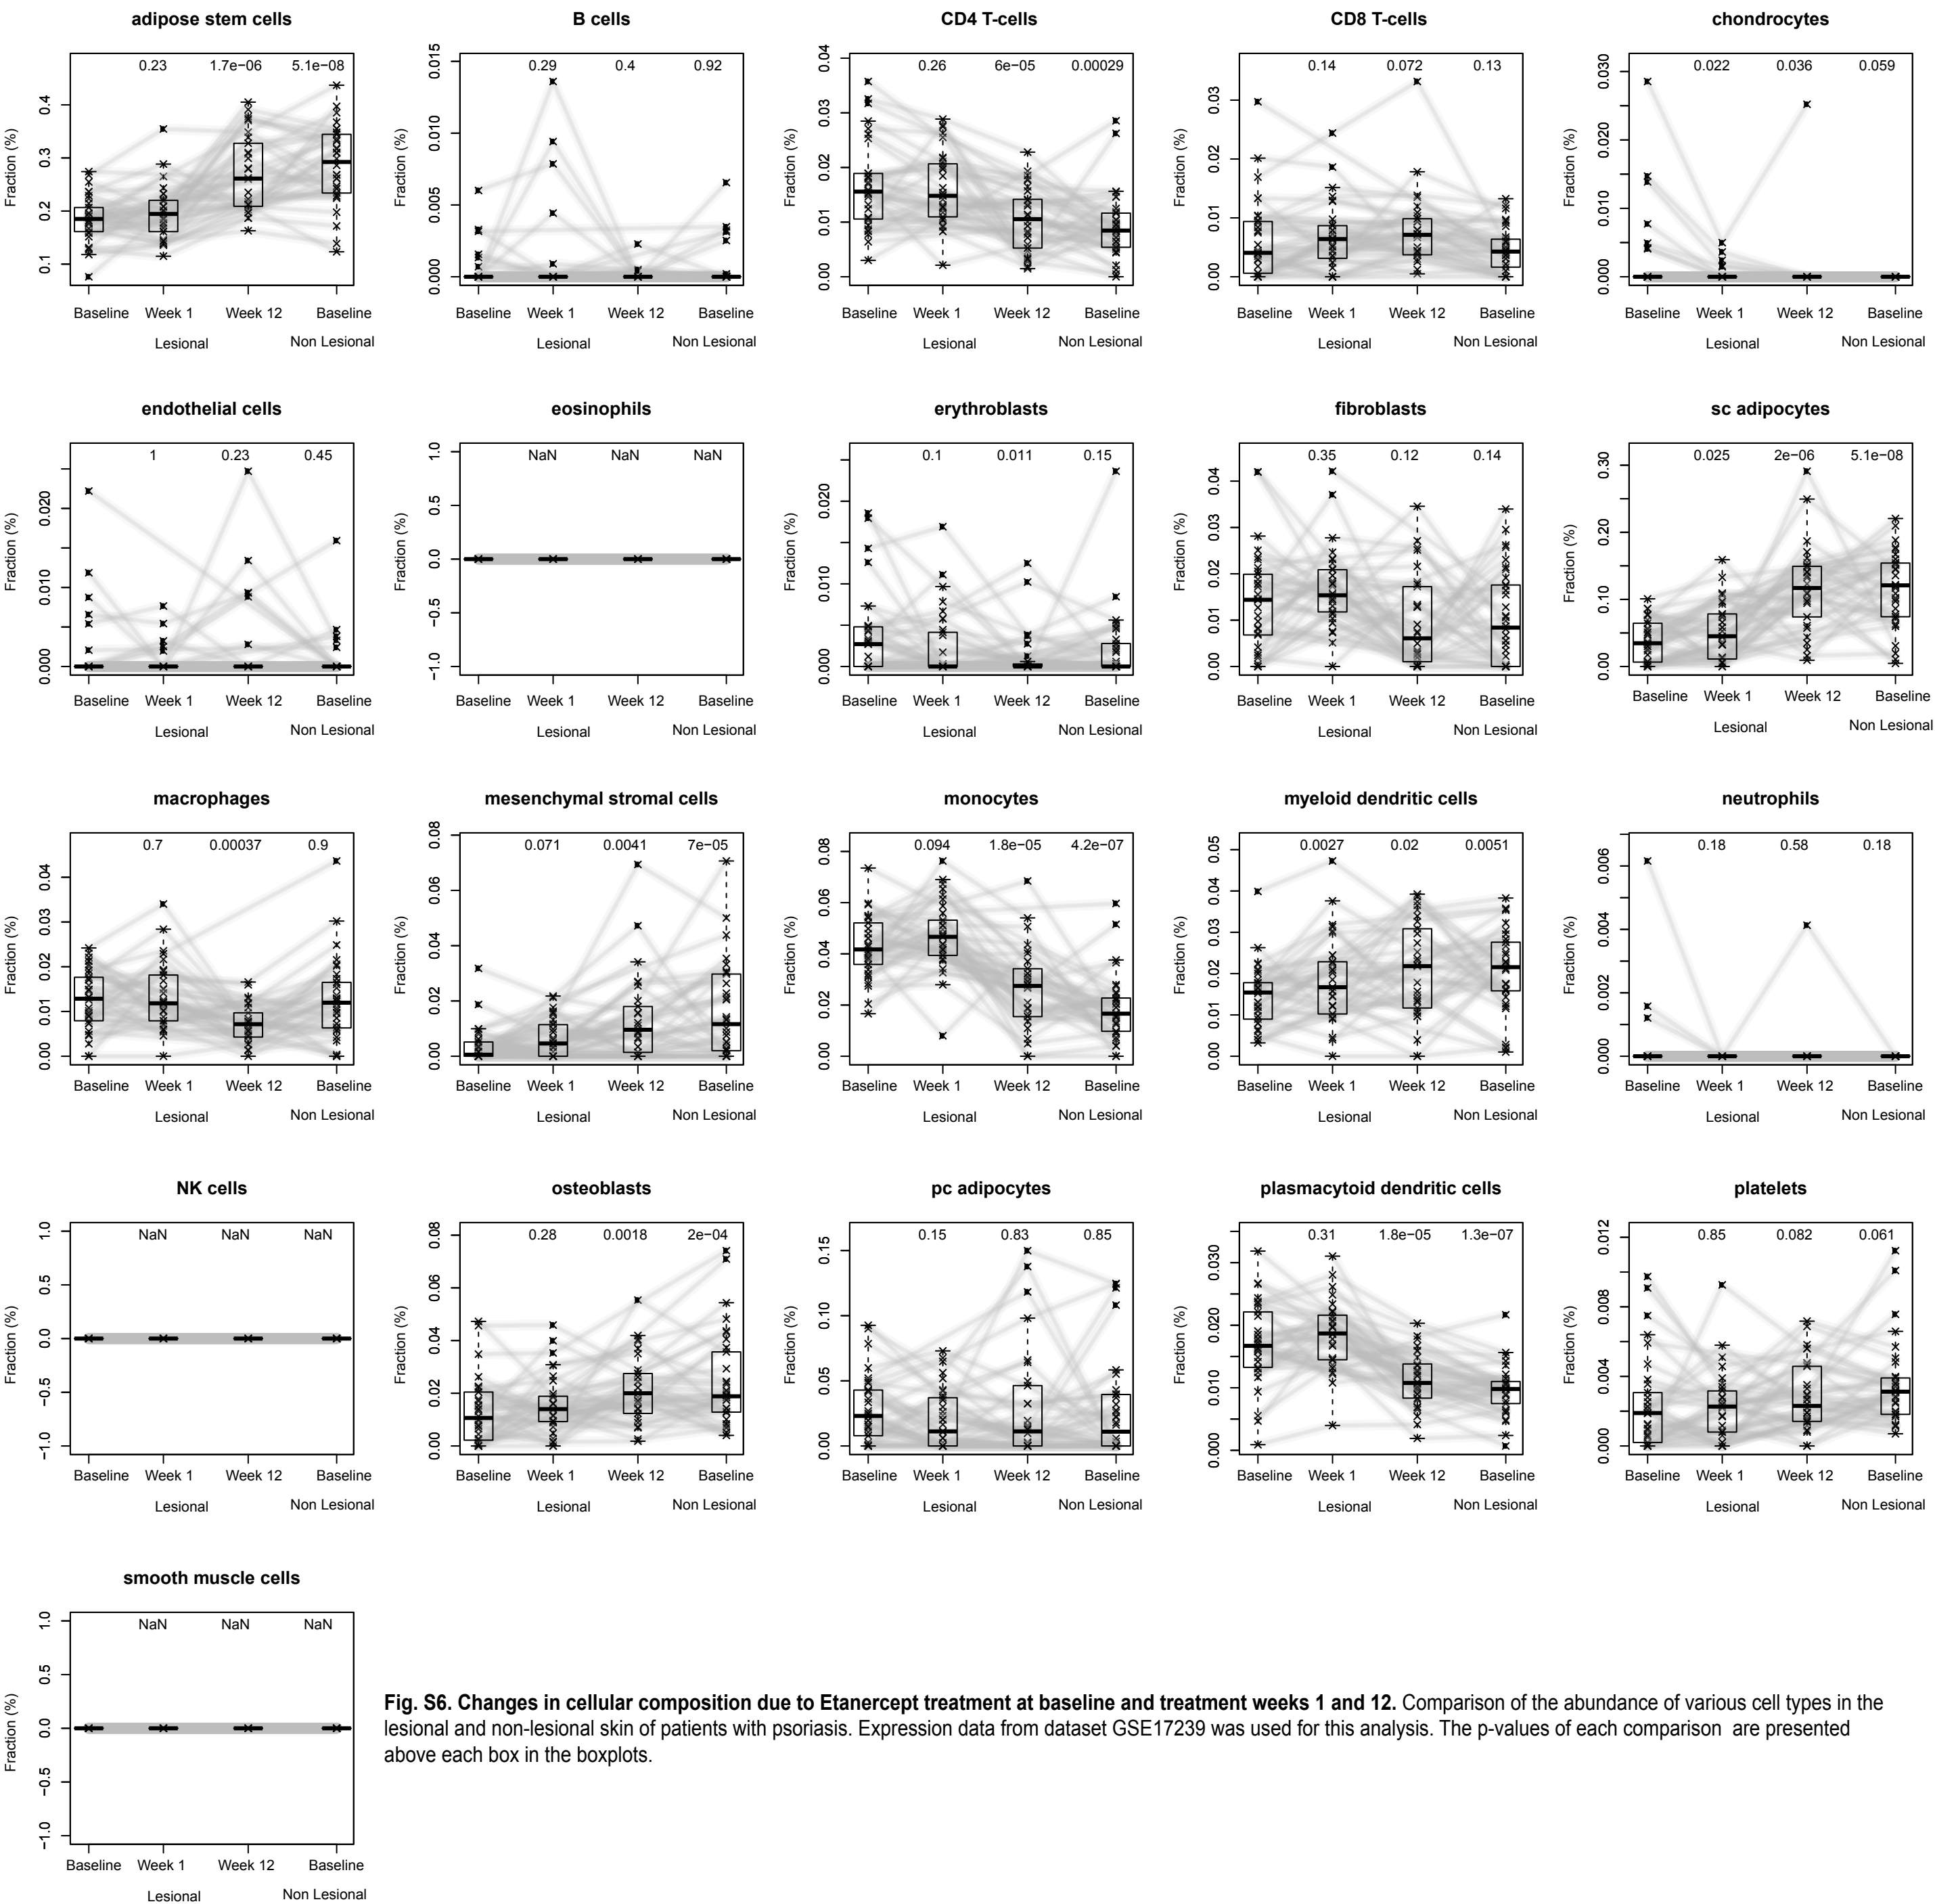

Supplement: 12920_2019_567_MOESM9_ESM.pdf [file 12920_2019_567_MOESM9_ESM.pdf]
